# Supplementary material
Source: MDPI journal article supplement (https://www.mdpi.com/2313-0105/9/3/166)
Supplement: s1 [file s1]

## Supporting Information

### Ion Transport Regulated Lithium Metal Batteries Achieved by Electrospun ZIF/PAN Composite Separator with Suitable Electrolyte Wettability

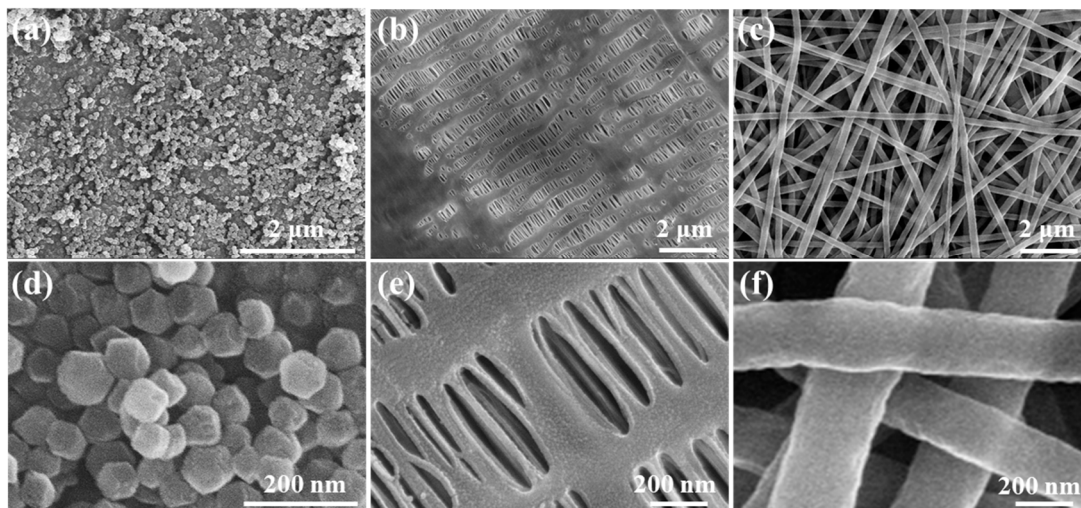

**Figure S1.** The SEM images of (a,d) ZIF-8 nanoparticles; (b,e) PP separator; (c,f) PAN separator under different magnification.

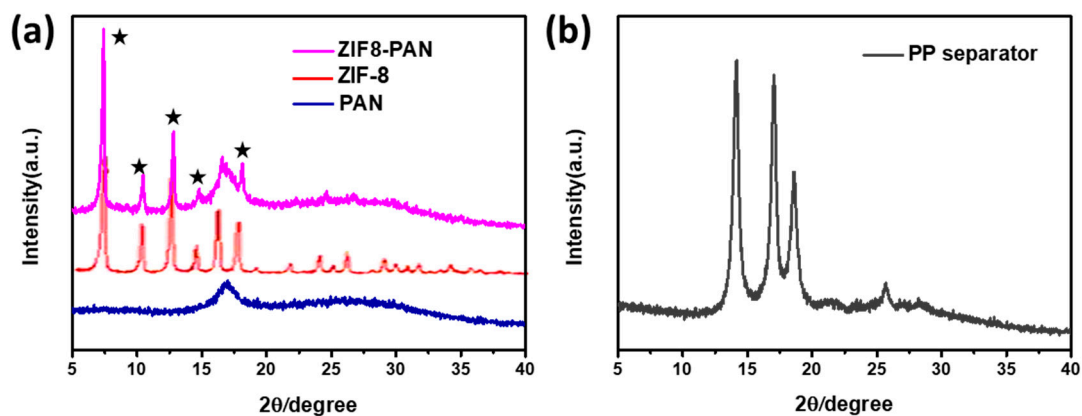

**Figure S2.** (a) The XRD results of ZIF-8 power, PAN nanofiber, and ZIF8-PAN composite separator (the black stars identify the characteristic peaks of ZIF-8 in ZIF8-PAN). (b) The XRD pattern of PP separator.

**Table S1.** The physical and electrochemical properties of PP, PAN and ZIF8-PAN separators.

| Measurement                          | PP    | PAN   | ZIF8-PAN |
|--------------------------------------|-------|-------|----------|
| Thickness ( $\mu\text{m}$ )          | 25    | 20-25 | 25-30    |
| Porosity <sup>a)</sup> (%)           | 27.7  | 52.1  | 47.2     |
| Electrolyte uptake <sup>b)</sup> (%) | 127.1 | 194.7 | 176.5    |
| $\sigma$ (mS/cm)                     | 0.507 | 0.634 | 1.176    |
| $t_{\text{Li}^+}$                    | 0.214 | 0.288 | 0.306    |
| ESW (V)                              | 4.75  | 4.73  | 5.04     |

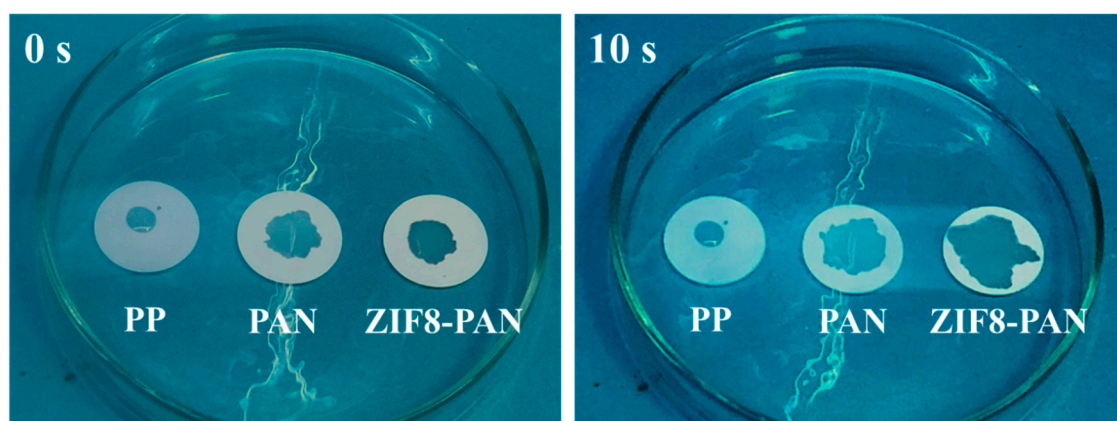

**Figure S3.** Optical photographs after pouring liquid electrolyte [1 M LiTFSI in DOL+DME (1:1, w/w) with 2% LiNO<sub>3</sub>] onto different separators.

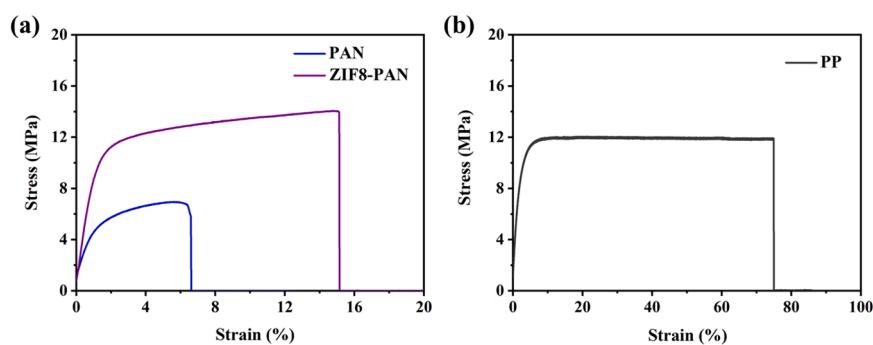

**Figure S4.** Stress-strain curves of (a) PAN, ZIF8-PAN separators and (b) PP separator.

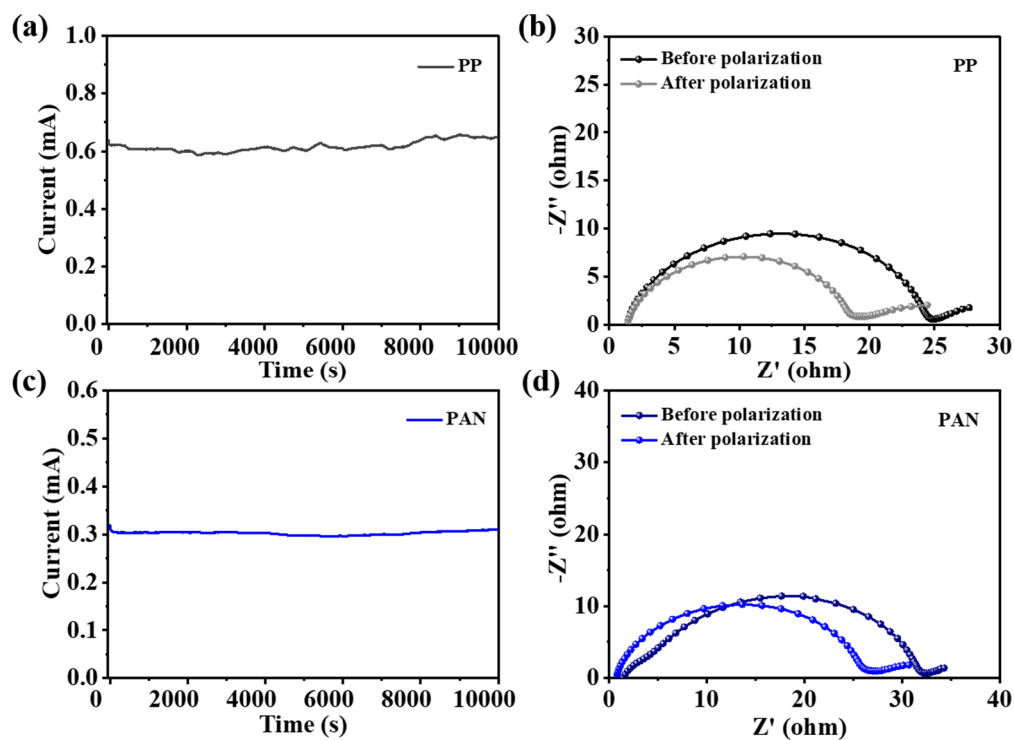

**Figure S5.** (a,c) Chronoamperometry profiles and (b,d) Nyquist plots before and after polarization for Li//Li symmetric cells with PP and PAN separators, respectively.

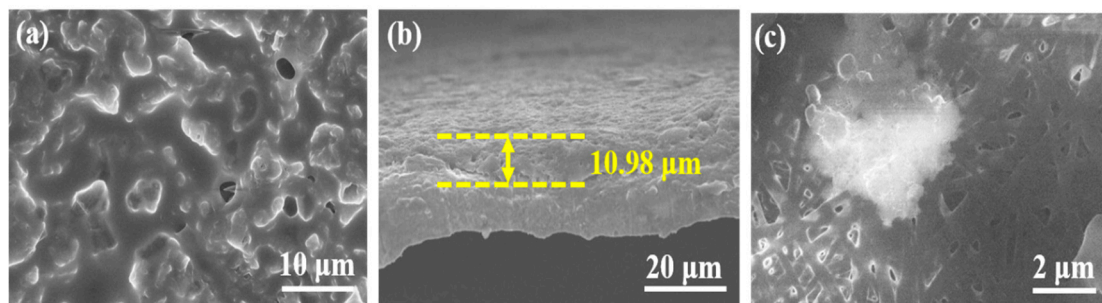

**Figure S6.** SEM images of (a) top-surface, (b) cross-section of Cu foils and (c) the surface of the PAN separator disassembled from Li/PAN/Cu half cells.

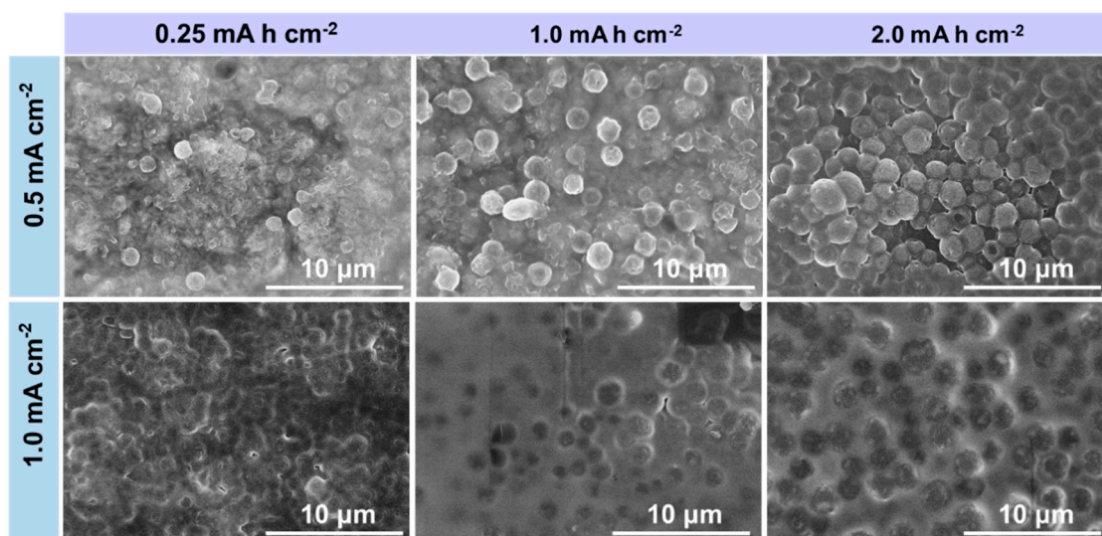

**Figure S7.** Morphologies of lithium deposited on the surface of Cu foils for 0.25 mA h cm<sup>-2</sup>, 1.0 mA h cm<sup>-2</sup> and 2.0 mA h cm<sup>-2</sup> with Li//Cu half cells assembled with ZIF8-PAN separators at current densities of 0.5 mA cm<sup>-2</sup> and 1.0 mA cm<sup>-2</sup> after 50 cycles, respectively.

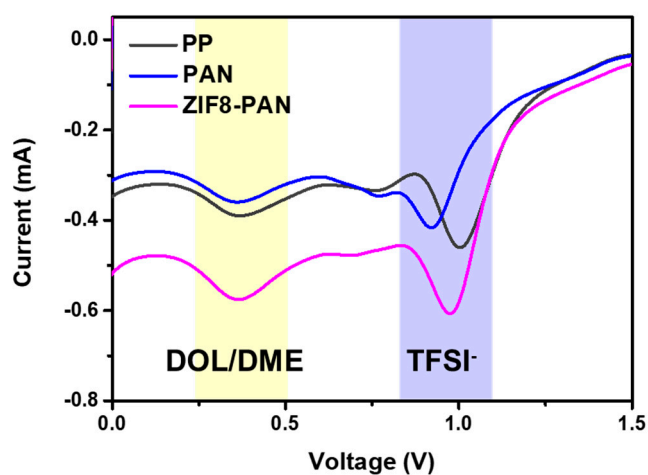

**Figure S8.** Initial discharge CV curves of cells assembled with different separators.

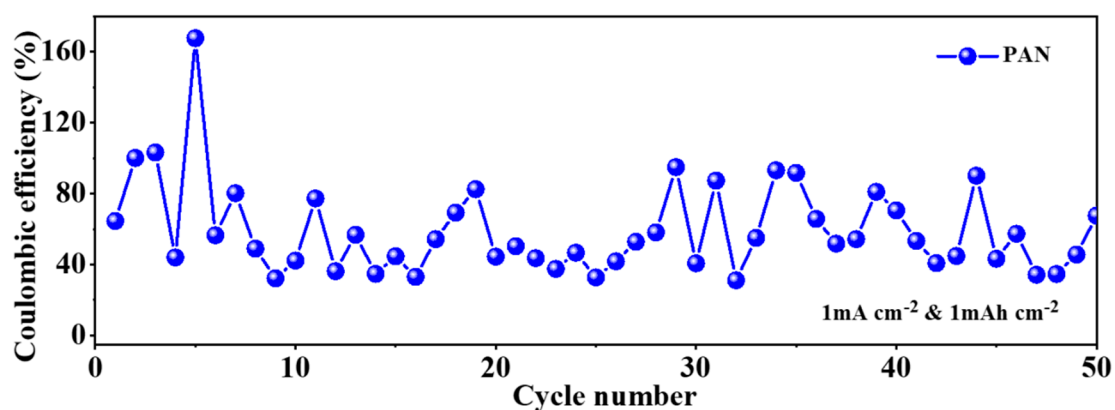

**Figure S9.** The Coulombic efficiency of Li//Cu half cells with the PAN separator for a current density of  $1.0 \text{ mA/cm}^2$  with an area capacity of  $1.0 \text{ mAh/cm}^2$  at  $25^\circ\text{C}$ .

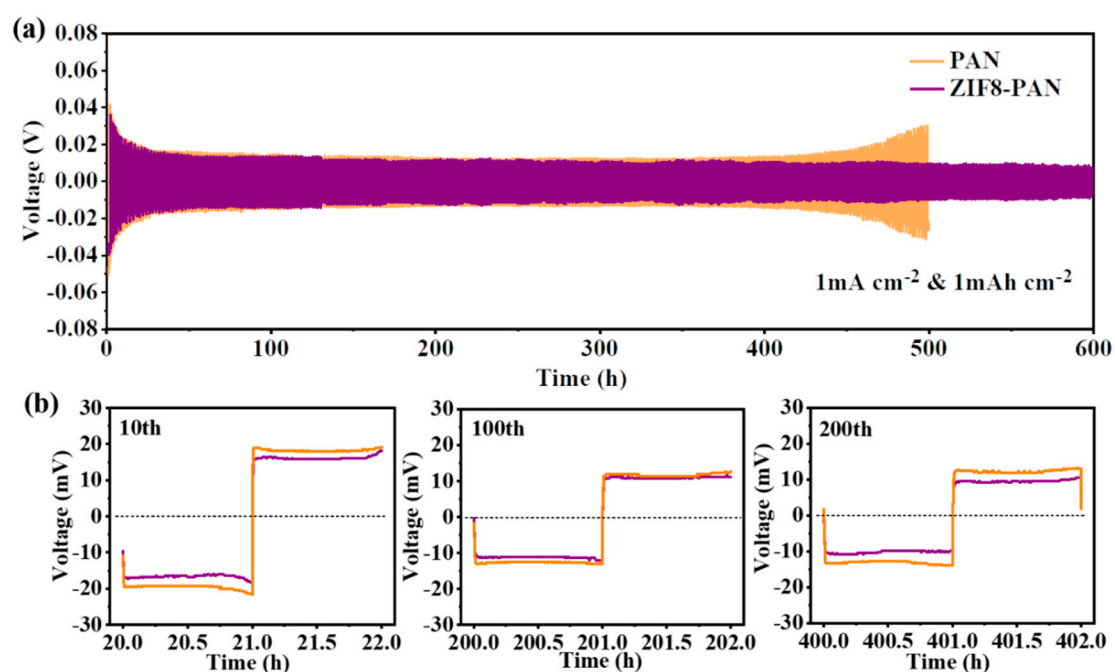

**Figure S10.** (a) The cycling stability of the Li//Li symmetric cells assembled with PAN separator at a current density of  $1.0 \text{ mA cm}^{-2}$  with an area capacity of  $1.0 \text{ mA h cm}^{-2}$  at  $25^\circ\text{C}$  (The contrast data of ZIF8-PAN is the same as Figure 6a). (b) Corresponding voltage profiles at the 10th, 100th and 200th cycle.



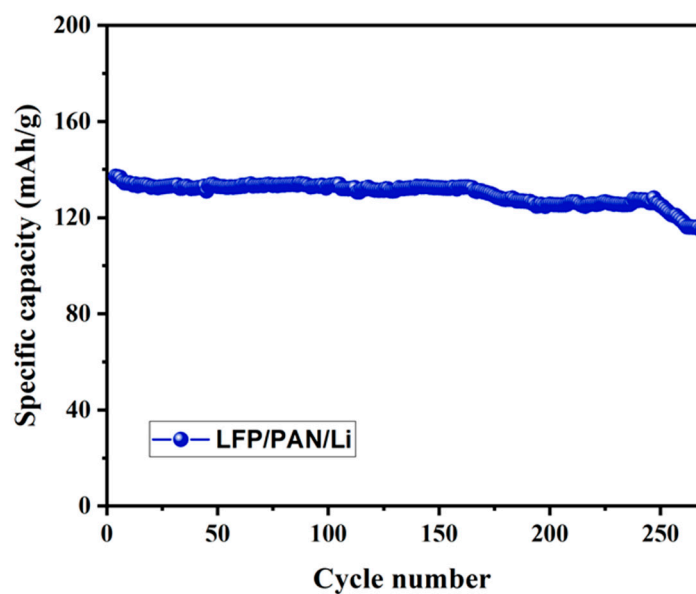

**Figure S11.** The cyclic performance of LiFePO<sub>4</sub>//Li full batteries assembled with PAN separator at 0.5 C.

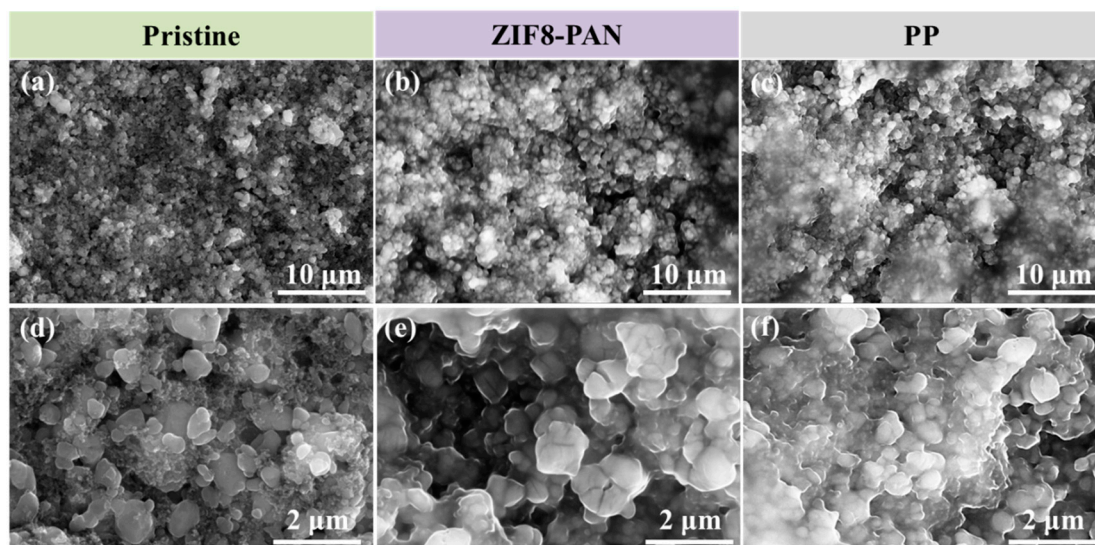

**Figure S12.** The SEM analysis of pristine and 270th cycled LiFePO<sub>4</sub> electrodes tested in full batteries using PP and ZIF8-PAN separator.
